# Supplementary material for: Structure and Mechanism of Pseudomonas aeruginosa PA0254/HudA, a prFMN-Dependent Pyrrole-2-carboxylic Acid Decarboxylase Linked to Virulence
Source: PubMed Central journal article supplement (PMC7976604; doi:10.1021/acscatal.0c05042), 2021-02-17
Supplement: cs0c05042_si_001.pdf [file cs0c05042_si_001.pdf]

## Supporting information

### Structure and mechanism of *Pseudomonas aeruginosa* PA0254/HudA, a prFMN-dependent pyrrole-2-carboxylic acid decarboxylase linked to virulence

Karl A.P. Payne<sup>1§</sup>, Stephen A. Marshall<sup>1</sup>, Karl Fisher<sup>1</sup>, Stephen E.J. Rigby<sup>1</sup>, Matthew J. Cliff<sup>1</sup>, Reynard Spiess<sup>1</sup>, Diego M. Cannas<sup>2</sup>, Igor Larrosa<sup>2</sup>, Sam Hay<sup>1</sup>, David Leys<sup>1\*</sup>

<sup>1</sup>Manchester Institute of Biotechnology, University of Manchester, 131 Princess Street, Manchester, M1 7DN, UK

<sup>2</sup>Department of Chemistry, University of Manchester, Chemistry Building, Oxford Road, Manchester, M13 9PL, UK

<sup>§</sup>present address :FBRH, University of Manchester, 131 Princess Street, Manchester, M1 7DN, UK

\*david.leys@manchester.ac.uk

#### DFT Supporting Information:

**Table S1.** HF energy (hartrees) computed for the Int1<sup>closed</sup> adducts of P2C, F2C, T2C, Im2C and Im4C with prFMN in implicit water.

|                     | Int1 <sup>open</sup> | Int1 <sup>closed</sup> | Int1 <sup>open</sup> -Int1 <sup>closed</sup><br>(kJ/mol) |
|---------------------|----------------------|------------------------|----------------------------------------------------------|
| P2C                 | -1580.872256         | -1580.875149           | +7.6                                                     |
| F2C                 | -1600.725775         | -1600.738391           | +33.1                                                    |
| T2C                 | -1923.710723         | -1923.721422           | +28.1                                                    |
| Im2C                | -1596.912481         | -1596.897529           | -39.3*                                                   |
| Im2C-H <sup>+</sup> | -1597.369815         | Not stable             | -                                                        |
| Im4C                | -1596.921557         | -1596.93624            | +38.5                                                    |

\* note that only Im2C has a more stable Int1<sup>open</sup> adduct relative to Int1<sup>closed</sup>.

**Table S2.** Natural charges computed for the substrate moiety of the Int1<sup>open</sup> and Int1<sup>closed</sup> adducts of P2C, F2C, T2C, Im2C and Im4C with prFMN in implicit water.

|                     | Int1 <sup>open</sup> | Int1 <sup>closed</sup> | Int1 <sup>open</sup> – Int1 <sup>closed</sup> |
|---------------------|----------------------|------------------------|-----------------------------------------------|
| P2C                 | -0.36                | -0.90                  | +0.53                                         |
| F2C                 | -0.56                | -0.91                  | +0.36                                         |
| T2C                 | -0.62                | -0.93                  | +0.31                                         |
| Im2C                | -0.49                | -1.13                  | +0.65                                         |
| Im2C-H <sup>+</sup> | -0.10*               | Not stable             | -                                             |
| Im4C                | -0.50                | -0.91                  | +0.41                                         |

\* note that Im2C-H<sup>+</sup> has a neutral charge, whereas all other substrates/inhibitors have a charge of -1.

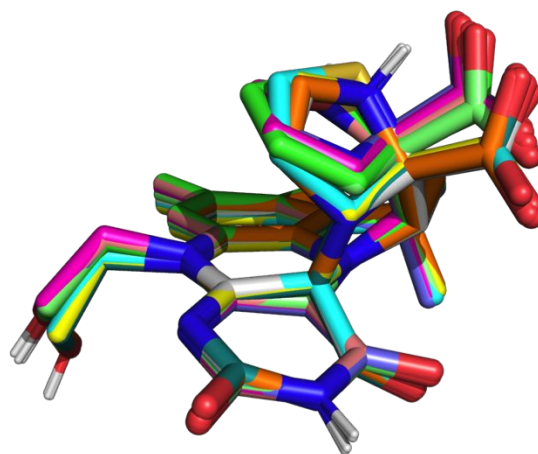

**Figure S1.** Alignment of the Int1<sup>open</sup> and Int1<sup>closed</sup> prFMN- P2C, F2C, T2C, Im2C and Im4C species.

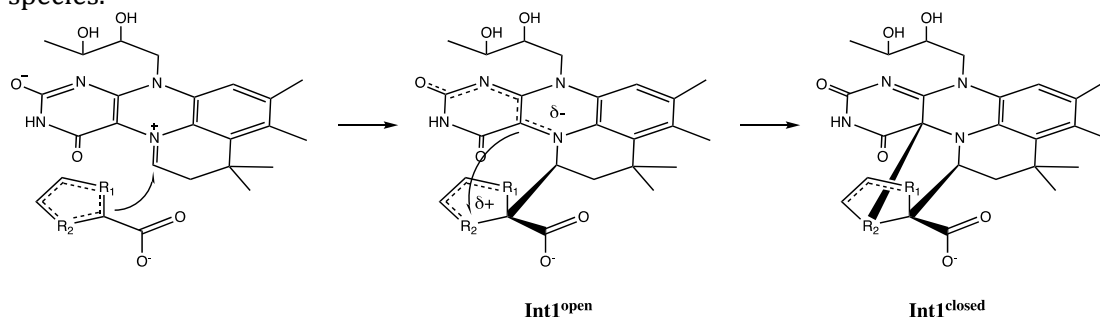

**Scheme S1.** The DFT models used in this study, showing a 2-step mechanism for the formation of Int 1. In all cases except for protonated Im2C, there is partial electron transfer from the substrate to the prFMN to form the ring-open adduct. The ring closed adduct is formed by electron transfer back from the prFMN to the substrate moiety of the adduct.
